# Supplementary material
Source: publisher figshare collection journal article supplement (https://tandf.figshare.com/ndownloader/files/14107925)
Supplement: Supplementary file 1 [file 14107925]

**SUPPLEMENTAL DATA**

This Appendix is a chronologically-arranged list of Ted Spinner’s 34 major scientific publications.

Spinner E. 1965. Westphalian D megaspores from the Forest of Dean Coalfield, England. Palaeontology 8:82–106.

Spinner E. 1966. Palynological evidence on the age of the Carboniferous beds of Woodbury Hill, near Abberley, Worcestershire. Proceedings of the Yorkshire Geological Society 35:507–522.

Butterworth MA, Spinner E. 1967. Lower Carboniferous spores from north-west England. Palaeontology 10:1–24.

Spinner E. 1968. Contribution on the megaspore genus *Tuberculatisporites* (Ibrahim) Potonie and Kremp 1954. Pollen et Spores 10:395–410.

Higgins AC, Spinner EG. 1968. Techniques for the extraction of selected microfossils. Welsh Geological Quarterly 4:25–36.

Spinner E. 1969. Megaspore assemblages from Viséan deposits at Dunbar, East Lothian, Scotland. Palaeontology 12:441–458.

Spinner E. 1969. Preliminary study of the megaspores from the Tupe Formation, Quebrada del Tupe, La Rioja, Argentina. Pollen et Spores 11:669–685.

Moore LM, Moore JRM, Spinner, E. 1969. A geomicrobiological study of the Pre-Cambrian Nonesuch Shale. Proceedings of the Yorkshire Geological Society 37:351–394.

Wagner RH, Spinner E. 1972. The stratigraphic implications of the Westphalian D macro- and microflora of the Forest of Dean Coalfield (Gloucestershire), England. Proceedings of the International Geological Congress (Montreal, 1972), Section 7:428–437.

Spinner E. 1982. Further studies on the megaspore genus *Setispora* Butterworth and Spinner 1967. Pollen et Spores 24:301–313.

Spinner E. 1982. A new megaspore genus from the Lower Carboniferous (Asbian) of northern England. Journal of Micropalaeontology 1:19–22.

Spinner E. 1983. Some new sporomorphs from the Lower Carboniferous of N. W. England. Pollen et Spores 25:117–129.

Spinner E. 1983. Two new species of *Lagenicula* from the Upper Carboniferous (Westphalian B) of North Derbyshire, England. Pollen et Spores 25:243–251.

Spinner E. 1983. *Velumousspora,* a megaspore genus from the Namurian of northern England. Journal of Micropalaeontology 2:67–70.

Spinner E. 1984. New evidence on the sporomorph genus *Carbaneuletes* Spinner 1983, from the Lower Carboniferous deposits of the Forest of Dean Basin, Gloucestershire, England. Pollen et Spores 26:117–126.

Spinner E. 1984. The occurrence and distribution of megaspores in the Drybrook Sandstone and associated measures of the Forest of Dean basin, Gloucestershire, England. Journal of Micropalaeontology 3:37–41.

Spinner EG. 1986. Sheffield's worldwide palynologists. Journal of the University of Sheffield Geological Society 8:222–227.

Brindley S, Spinner E. 1986. Spores from Lower Carboniferous deposits at Burntisland, Fife, Scotland. Pollen et Spores 28:435–450.

Turner N, Spinner E. 1988. A palynological study of the Lower Carboniferous strata (Dinantian), from Titterstone Clee, Shropshire, England. Pollen et Spores 30:429–449.

Brindley S, Spinner E. 1989. Palynological assemblages from Lower Carboniferous deposits, Burntisland district, Fife, Scotland. Proceedings of the Yorkshire Geological Society 47:215–231.

Jolley DW, Spinner, E. 1989. Some dinoflagellate cysts from the London Clay (Palaeocene–Eocene) near Ipswich, Suffolk, England. Review of Palaeobotany and Palynology 60:361–373.

Turner N, Spinner E, Soanes C. 1989. Further studies on the palynology of the Upper Devonian–Lower Carboniferous transition strata at Burrington Combe, Somerset, England. Pollen et Spores 31:289–315.

Spinner E. 1990. *Tricontactispora*, a new genus of megaspores from the Namurian of the southern Pennines, Derbyshire, England. Proceedings of the Yorkshire Geological Society 48:143–147.

Turner N, Spinner E. 1990. Palynological evidence for the age of the Coal Measures of the Titterstone Clee Coalfield, Shropshire, England. Proceedings of the Yorkshire Geological Society 48:81–98.

Turner N, Spinner E. 1990. *Trimurornatispora*, a new genus of miospores from the Cornbrook Sandstone Formation, Lower Namurian (Carboniferous), Clee Hills, Shropshire, England. Palynology 14:19–25.

Turner N, Spinner E. 1992. Palynological evidence for the early Namurian age of the “Millstone Grit” and Upper Limestone Group around Longhoughton Steel, Northumberland. Proceedings of the Yorkshire Geological Society 49:11–22.

Turner N, Spinner E. 1993. A palynostratigraphic study of Namurian–Westphalian deltaic sequences of the southern central Pennine Basin, Derbyshire, England. Review of Palaeobotany and Palynology 77:23–43.

Turner N, Spinner E, Spode F, Wignall PB. 1994. Palynostratigraphy of a Carboniferous transgressive systems tract from the earliest Alportian (Namurian) of Britain. Review of Palaeobotany and Palynology 80:39–54.

Turner N, Spinner E, DorningKJ. 1995. A palynological study of the Lower Carboniferous Lydebrook Sandstone and adjacent late Wenlock and Langsettian strata, Shropshire, England. Review of Palaeobotany and Palynology 84:305–329.

Turner N, Spinner E. 1996. Namurian (Arnsbergian/Chokierian) megaspore assemblages from northeast England. Review of Palaeobotany and Palynology 94:211–230.

Austin RL, Owens B, Spinner E. 2004. Alan Charles Higgins (1936–2004). Journal of Micropalaeontology 23:191–192.

Spinner EG, Lunn P, Owens B. 2004. Obituary. Leslie Rowsell Moore. Proceedings of the Yorkshire Geological Society 55:159–160.

Spinner E, Owens B, Lunn P. 2004. Professor Leslie Rowsell Moore 1912–2003. Journal of Micropalaeontology 23:1–2.

Wellman CH, Arioli C, Spinner EG, Vecoli M. 2009. Morphology and wall ultrastructure of the megaspore *Lagenicula* (*Triletes*) *mixta* (Winslow 1962) comb. nov. from the Carboniferous (Early Mississippian: mid Tournaisian) of Ohio, USA. Review of Palaeobotany and Palynology 156:51–61.
